# Supplementary material for: Association of Preoperative Frailty and Operative Stress With Mortality After Elective vs Emergency Surgery
Source: PubMed Central journal article supplement (PMC7358909; doi:10.1001/jamanetworkopen.2020.10358), 2020-07-13
Supplement: jamanetwopen-3-e2010358-s001.pdf [file jamanetwopen-3-e2010358-s001.pdf]

## Supplementary Online Content

Shinall MC Jr, Youk A, Massarweh NN, et al. Association of preoperative frailty and operative stress with mortality after elective vs emergency surgery. *JAMA Netw Open.* 2020;3(7):e2010358. doi:10.1001/jamanetworkopen.2020.10358

**eTable.** OSS Scores for 565 CPT Codes

**eFigure.** Revised RAI Scoring

**eReferences**

This supplementary material has been provided by the authors to give readers additional information about their work.

eTable: OSS Scores for 565 CPT Codes

| <b>CPT Code</b> | <b>OSS</b> | <b>CPT Description</b>                                                                                                                                                                                                                                                                                                                                                                                                                                                                       |
|-----------------|------------|----------------------------------------------------------------------------------------------------------------------------------------------------------------------------------------------------------------------------------------------------------------------------------------------------------------------------------------------------------------------------------------------------------------------------------------------------------------------------------------------|
| 10121           | 1          | Incision and removal of foreign body, subcutaneous tissues; complicated                                                                                                                                                                                                                                                                                                                                                                                                                      |
| 10140           | 1          | Incision and drainage of hematoma, seroma or fluid collection                                                                                                                                                                                                                                                                                                                                                                                                                                |
| 10180           | 2          | Incision and drainage, complex, postoperative wound infection                                                                                                                                                                                                                                                                                                                                                                                                                                |
| 11004           | 3          | Debridement of skin, subcutaneous tissue, muscle and fascia for necrotizing soft tissue infection; external genitalia and perineum                                                                                                                                                                                                                                                                                                                                                           |
| 11005           | 3          | Necrotizing soft tissue infection; abdominal wall, with or without fascial closure                                                                                                                                                                                                                                                                                                                                                                                                           |
| 11006           | 3          | Debridement of skin, subcutaneous tissue, muscle and fascia for necrotizing soft tissue infection; external genitalia, perineum and abdominal wall, with or without fascial closure                                                                                                                                                                                                                                                                                                          |
| 11042           | 2          | Debridement, subcutaneous tissue (includes epidermis and dermis, if performed); first 20 sq cm or less                                                                                                                                                                                                                                                                                                                                                                                       |
| 11043           | 2          | Debridement, muscle and/or fascia (includes epidermis, dermis, and subcutaneous tissue, if performed); first 20 sq cm or less                                                                                                                                                                                                                                                                                                                                                                |
| 11044           | 2          | Debridement, bone (includes epidermis, dermis, subcutaneous tissue, muscle and/or fascia, if performed); first 20 sq cm or less                                                                                                                                                                                                                                                                                                                                                              |
| 14060           | 1          | Adjacent tissue transfer or rearrangement, eyelids, nose, ears and/or lips; defect 10 sq cm or less                                                                                                                                                                                                                                                                                                                                                                                          |
| 15100           | 2          | Split-thickness autograft, trunk, arms, legs; first 100 sq cm or less, or 1% of body area of infants and children (except 15050)                                                                                                                                                                                                                                                                                                                                                             |
| 15120           | 2          | Split-thickness autograft, face, scalp, eyelids, mouth, neck, ears, orbits, genitalia, hands, feet, and/or multiple digits; first 100 sq cm or less, or 1% of body area of infants and children (except 15050)                                                                                                                                                                                                                                                                               |
| 15260           | 1          | Full thickness graft, free, including direct closure of donor site, nose, ears, eyelids, and/or lips; 20 sq cm or less                                                                                                                                                                                                                                                                                                                                                                       |
| 15576           | 2          | Formation of direct or tubed pedicle, with or without transfer; eyelids, nose, ears, lips, or intraoral                                                                                                                                                                                                                                                                                                                                                                                      |
| 15620           | 2          | Delay of flap or sectioning of flap (division and inset); at forehead, cheeks, chin, neck, axillae, genitalia, hands, or feet                                                                                                                                                                                                                                                                                                                                                                |
| 15630           | 2          | Delay of flap or sectioning of flap (division and inset); at eyelids, nose, ears, or lips                                                                                                                                                                                                                                                                                                                                                                                                    |
| 15731           | 2          | Forehead flap with preservation of vascular pedicle (eg, axial pattern flap, paramedian forehead flap)                                                                                                                                                                                                                                                                                                                                                                                       |
| 15732           | 3          | Muscle, myocutaneous, or fasciocutaneous flap; head and neck (eg, temporalis, masseter muscle, sternocleidomastoid, levator scapulae)                                                                                                                                                                                                                                                                                                                                                        |
| 15734           | 3          | Muscle, myocutaneous, or fasciocutaneous flap; trunk                                                                                                                                                                                                                                                                                                                                                                                                                                         |
| 15738           | 3          | Muscle, myocutaneous, or fasciocutaneous flap; lower extremity                                                                                                                                                                                                                                                                                                                                                                                                                               |
| 15830           | 2          | Excision, excessive skin and subcutaneous tissue (includes lipectomy); abdomen, infraumbilical panniculectomy                                                                                                                                                                                                                                                                                                                                                                                |
| 15877           | 2          | Suction assisted lipectomy; trunk                                                                                                                                                                                                                                                                                                                                                                                                                                                            |
| 15940           | 2          | Excision, ischial pressure ulcer, with primary suture                                                                                                                                                                                                                                                                                                                                                                                                                                        |
| 15946           | 2          | Excision, ischial pressure ulcer, with ostectomy, in preparation for muscle or myocutaneous flap or skin graft closure                                                                                                                                                                                                                                                                                                                                                                       |
| 17311           | 2          | Mohs micrographic technique, including removal of all gross tumor, surgical excision of tissue specimens, mapping, color coding of specimens, microscopic examination of specimens by the surgeon, and histopathologic preparation including routine stain(s) (eg, hematoxylin and eosin, toluidine blue), head, neck, hands, feet, genitalia, or any location with surgery directly involving muscle, cartilage, bone, tendon, major nerves, or vessels; first stage, up to 5 tissue blocks |
| 19020           | 2          | Mastotomy with exploration or drainage of abscess, deep                                                                                                                                                                                                                                                                                                                                                                                                                                      |
| 19120           | 2          | Excision of cyst, fibroadenoma, or other benign or malignant tumor, aberrant breast tissue, duct lesion, nipple or areolar lesion (except 19300), open, male or female, 1 or more lesions                                                                                                                                                                                                                                                                                                    |

| <b>CPT Code</b> | <b>OSS</b> | <b>CPT Description</b>                                                                                                                                                                                                                        |
|-----------------|------------|-----------------------------------------------------------------------------------------------------------------------------------------------------------------------------------------------------------------------------------------------|
| 19125           | 2          | Excision of breast lesion identified by preoperative placement of radiological marker, open; single lesion                                                                                                                                    |
| 19300           | 2          | Mastectomy for gynecomastia                                                                                                                                                                                                                   |
| 19301           | 2          | Mastectomy, partial (eg, lumpectomy, tylectomy, quadrantectomy, segmentectomy);                                                                                                                                                               |
| 19302           | 2          | Mastectomy, partial (eg, lumpectomy, tylectomy, quadrantectomy, segmentectomy); with axillary lymphadenectomy                                                                                                                                 |
| 19303           | 2          | Mastectomy, simple, complete                                                                                                                                                                                                                  |
| 19304           | 2          | Mastectomy, subcutaneous                                                                                                                                                                                                                      |
| 19307           | 3          | Mastectomy, modified radical, including axillary lymph nodes, with or without pectoralis minor muscle, but excluding pectoralis major muscle                                                                                                  |
| 19318           | 2          | Reduction mammoplasty                                                                                                                                                                                                                         |
| 19328           | 1          | Removal of intact mammary implant                                                                                                                                                                                                             |
| 19342           | 2          | Delayed insertion of breast prosthesis following mastopexy, mastectomy or in reconstruction                                                                                                                                                   |
| 19350           | 1          | Nipple/areola reconstruction                                                                                                                                                                                                                  |
| 19357           | 2          | Breast reconstruction, immediate or delayed, with tissue expander, including subsequent expansion                                                                                                                                             |
| 19371           | 2          | Periprosthetic capsulectomy, breast                                                                                                                                                                                                           |
| 19380           | 2          | Revision of reconstructed breast                                                                                                                                                                                                              |
| 20005           | 2          | Incision and drainage of soft tissue abscess, subfascial (ie, involves the soft tissue below the deep fascia)                                                                                                                                 |
| 20103           | 2          | Exploration of penetrating wound (separate procedure); extremity                                                                                                                                                                              |
| 20680           | 2          | Removal of implant; deep (eg, buried wire, pin, screw, metal band, nail, rod or plate)                                                                                                                                                        |
| 21025           | 3          | Excision of bone (eg, for osteomyelitis or bone abscess); mandible                                                                                                                                                                            |
| 21215           | 3          | Graft, bone; mandible (includes obtaining graft)                                                                                                                                                                                              |
| 21390           | 3          | Open treatment of orbital floor blowout fracture; periorbital approach, with alloplastic or other implant                                                                                                                                     |
| 21462           | 2          | Open treatment of mandibular fracture; with interdental fixation                                                                                                                                                                              |
| 21470           | 3          | Open treatment of complicated mandibular fracture by multiple surgical approaches including internal fixation, interdental fixation, and/or wiring of dentures or splints                                                                     |
| 21501           | 2          | Incision and drainage, deep abscess or hematoma, soft tissues of neck or thorax                                                                                                                                                               |
| 21627           | 3          | Sternal debridement                                                                                                                                                                                                                           |
| 21750           | 3          | Closure of median sternotomy separation with or without debridement (separate procedure)                                                                                                                                                      |
| 22551           | 2          | Arthrodesis, anterior interbody, including disc space preparation, discectomy, osteophyctomy and decompression of spinal cord and/or nerve roots; cervical below C2                                                                           |
| 22554           | 2          | Arthrodesis, anterior interbody technique, including minimal discectomy to prepare interspace (other than for decompression); cervical below C2                                                                                               |
| 22558           | 3          | Arthrodesis, anterior interbody technique, including minimal discectomy to prepare interspace (other than for decompression); lumbar                                                                                                          |
| 22600           | 3          | Arthrodesis, posterior or posterolateral technique, single level; cervical below C2 segment                                                                                                                                                   |
| 22612           | 3          | Arthrodesis, posterior or posterolateral technique, single level; lumbar (with lateral transverse technique, when performed)                                                                                                                  |
| 22630           | 3          | Arthrodesis, posterior interbody technique, including laminectomy and/or discectomy to prepare interspace (other than for decompression), single interspace; lumbar                                                                           |
| 22633           | 3          | Arthrodesis, combined posterior or posterolateral technique with posterior interbody technique including laminectomy and/or discectomy sufficient to prepare interspace (other than for decompression), single interspace and segment; lumbar |
| 22856           | 3          | Total disc arthroplasty (artificial disc), anterior approach, including discectomy with end plate preparation (includes osteophyctomy for nerve root or spinal cord decompression and microdissection); single interspace, cervical           |
| 22899           | 3          | Unlisted procedure, spine                                                                                                                                                                                                                     |

| <b>CPT Code</b> | <b>OSS</b> | <b>CPT Description</b>                                                                                                                                                                    |
|-----------------|------------|-------------------------------------------------------------------------------------------------------------------------------------------------------------------------------------------|
| 23030           | 2          | Incision and drainage, shoulder area; deep abscess or hematoma                                                                                                                            |
| 23120           | 1          | Claviculectomy; partial                                                                                                                                                                   |
| 23130           | 2          | Acromioplasty or acromionectomy, partial, with or without coracoacromial ligament release                                                                                                 |
| 23410           | 2          | Repair of ruptured musculotendinous cuff (eg, rotator cuff) open; acute                                                                                                                   |
| 23412           | 2          | Repair of ruptured musculotendinous cuff (eg, rotator cuff) open; chronic                                                                                                                 |
| 23415           | 2          | Coracoacromial ligament release, with or without acromioplasty                                                                                                                            |
| 23420           | 2          | Reconstruction of complete shoulder (rotator) cuff avulsion, chronic (includes acromioplasty)                                                                                             |
| 23430           | 2          | Tenodesis of long tendon of biceps                                                                                                                                                        |
| 23455           | 2          | Capsulorrhaphy, anterior; with labral repair (eg, Bankart procedure)                                                                                                                      |
| 23470           | 3          | Arthroplasty, glenohumeral joint; hemiarthroplasty                                                                                                                                        |
| 23472           | 3          | Arthroplasty, glenohumeral joint; total shoulder (glenoid and proximal humeral replacement (eg, total shoulder))                                                                          |
| 23515           | 2          | Open treatment of clavicular fracture, includes internal fixation, when performed                                                                                                         |
| 23550           | 2          | Open treatment of acromioclavicular dislocation, acute or chronic;                                                                                                                        |
| 23615           | 3          | Open treatment of proximal humeral (surgical or anatomical neck) fracture, includes internal fixation, when performed, includes repair of tuberosity(s), when performed;                  |
| 24105           | 2          | Excision, olecranon bursa                                                                                                                                                                 |
| 24341           | 2          | Repair, tendon or muscle, upper arm or elbow, each tendon or muscle, primary or secondary (excludes rotator cuff)                                                                         |
| 24342           | 2          | Reinsertion of ruptured biceps or triceps tendon, distal, with or without tendon graft                                                                                                    |
| 24358           | 2          | Tenotomy, elbow, lateral or medial (eg, epicondylitis, tennis elbow, golfer's elbow); debridement, soft tissue and/or bone, open                                                          |
| 24359           | 2          | Tenotomy, elbow, lateral or medial (eg, epicondylitis, tennis elbow, golfer's elbow); debridement, soft tissue and/or bone, open with tendon repair or reattachment                       |
| 24515           | 3          | Open treatment of humeral shaft fracture with plate/screws, with or without cerclage                                                                                                      |
| 24685           | 2          | Open treatment of ulnar fracture, proximal end (eg, olecranon or coronoid process[es]), includes internal fixation, when performed                                                        |
| 25000           | 1          | Incision, extensor tendon sheath, wrist (eg, deQuervains disease)                                                                                                                         |
| 25111           | 1          | Excision of ganglion, wrist (dorsal or volar); primary                                                                                                                                    |
| 25112           | 1          | Excision of ganglion, wrist (dorsal or volar); recurrent                                                                                                                                  |
| 25210           | 1          | Carpectomy; 1 bone                                                                                                                                                                        |
| 25215           | 2          | Carpectomy; all bones of proximal row                                                                                                                                                     |
| 25320           | 2          | Capsulorrhaphy or reconstruction, wrist, open (eg, capsulodesis, ligament repair, tendon transfer or graft) (includes synovectomy, capsulotomy and open reduction) for carpal instability |
| 25440           | 2          | Repair of nonunion, scaphoid carpal (navicular) bone, with or without radial styloidectomy (includes obtaining graft and necessary fixation)                                              |
| 25445           | 1          | Arthroplasty with prosthetic replacement; trapezium                                                                                                                                       |
| 25447           | 1          | Arthroplasty, interposition, intercarpal or carpometacarpal joints                                                                                                                        |
| 25606           | 2          | Percutaneous skeletal fixation of distal radial fracture or epiphyseal separation                                                                                                         |
| 25607           | 2          | Open treatment of distal radial extra-articular fracture or epiphyseal separation, with internal fixation                                                                                 |
| 25608           | 2          | Open treatment of distal radial intra-articular fracture or epiphyseal separation; with internal fixation of 2 fragments                                                                  |
| 25609           | 2          | Open treatment of distal radial intra-articular fracture or epiphyseal separation; with internal fixation of 3 or more fragments                                                          |
| 25628           | 2          | Open treatment of carpal scaphoid (navicular) fracture, includes internal fixation, when performed                                                                                        |
| 26121           | 1          | Fasciectomy, palm only, with or without Z-plasty, other local tissue rearrangement, or skin grafting (includes obtaining graft)                                                           |

| <b>CPT Code</b> | <b>OSS</b> | <b>CPT Description</b>                                                                                                                                                                                      |
|-----------------|------------|-------------------------------------------------------------------------------------------------------------------------------------------------------------------------------------------------------------|
| 26123           | 1          | Fasciectomy, partial palmar with release of single digit including proximal interphalangeal joint, with or without Z-plasty, other local tissue rearrangement, or skin grafting (includes obtaining graft); |
| 26350           | 1          | Repair or advancement, flexor tendon, not in zone 2 digital flexor tendon sheath (eg, no man's land); primary or secondary without free graft, each tendon                                                  |
| 26356           | 1          | Repair or advancement, flexor tendon, in zone 2 digital flexor tendon sheath (eg, no man's land); primary, without free graft, each tendon                                                                  |
| 26410           | 1          | Repair, extensor tendon, hand, primary or secondary; without free graft, each tendon                                                                                                                        |
| 26418           | 1          | Repair, extensor tendon, finger, primary or secondary; without free graft, each tendon                                                                                                                      |
| 26440           | 1          | Tenolysis, flexor tendon; palm OR finger, each tendon                                                                                                                                                       |
| 26530           | 1          | Arthroplasty, metacarpophalangeal joint; each joint                                                                                                                                                         |
| 26531           | 1          | Arthroplasty, metacarpophalangeal joint; with prosthetic implant, each joint                                                                                                                                |
| 26540           | 1          | Repair of collateral ligament, metacarpophalangeal or interphalangeal joint                                                                                                                                 |
| 26615           | 1          | Open treatment of metacarpal fracture, single, includes internal fixation, when performed, each bone                                                                                                        |
| 26727           | 1          | Percutaneous skeletal fixation of unstable phalangeal shaft fracture, proximal or middle phalanx, finger or thumb, with manipulation, each                                                                  |
| 26735           | 1          | Open treatment of phalangeal shaft fracture, proximal or middle phalanx, finger or thumb, includes internal fixation, when performed, each                                                                  |
| 26765           | 1          | Open treatment of distal phalangeal fracture, finger or thumb, includes internal fixation, when performed, each                                                                                             |
| 26952           | 1          | Amputation, finger or thumb, primary or secondary, any joint or phalanx, single, including neurectomies; with local advancement flaps (V-Y, hood)                                                           |
| 26990           | 3          | Incision and drainage, pelvis or hip joint area; deep abscess or hematoma                                                                                                                                   |
| 27125           | 3          | Hemiarthroplasty, hip, partial (eg, femoral stem prosthesis, bipolar arthroplasty)                                                                                                                          |
| 27130           | 3          | Arthroplasty, acetabular and proximal femoral prosthetic replacement (total hip arthroplasty), with or without autograft or allograft                                                                       |
| 27132           | 3          | Conversion of previous hip surgery to total hip arthroplasty, with or without autograft or allograft                                                                                                        |
| 27134           | 3          | Revision of total hip arthroplasty; both components, with or without autograft or allograft                                                                                                                 |
| 27137           | 3          | Revision of total hip arthroplasty; acetabular component only, with or without autograft or allograft                                                                                                       |
| 27138           | 3          | Revision of total hip arthroplasty; femoral component only, with or without allograft                                                                                                                       |
| 27235           | 2          | Percutaneous skeletal fixation of femoral fracture, proximal end, neck                                                                                                                                      |
| 27236           | 3          | Open treatment of femoral fracture, proximal end, neck, internal fixation or prosthetic replacement                                                                                                         |
| 27244           | 3          | Treatment of intertrochanteric, peritrochanteric, or subtrochanteric femoral fracture; with plate/screw type implant, with or without cerclage                                                              |
| 27245           | 3          | Treatment of intertrochanteric, peritrochanteric, or subtrochanteric femoral fracture; with intramedullary implant, with or without interlocking screws and/or cerclage                                     |
| 27299           | 3          | Unlisted procedure, pelvis or hip joint                                                                                                                                                                     |
| 27301           | 2          | Incision and drainage, deep abscess, bursa, or hematoma, thigh or knee region                                                                                                                               |
| 27310           | 2          | Arthrotomy, knee, with exploration, drainage, or removal of foreign body (eg, infection)                                                                                                                    |
| 27327           | 2          | Excision, tumor, soft tissue of thigh or knee area, subcutaneous; less than 3 cm                                                                                                                            |
| 27331           | 2          | Arthrotomy, knee; including joint exploration, biopsy, or removal of loose or foreign bodies                                                                                                                |
| 27332           | 2          | Arthrotomy, with excision of semilunar cartilage (meniscectomy) knee; medial OR lateral                                                                                                                     |
| 27334           | 2          | Arthrotomy, with synovectomy, knee; anterior OR posterior                                                                                                                                                   |
| 27340           | 2          | Excision, prepatellar bursa                                                                                                                                                                                 |
| 27380           | 2          | Suture of infrapatellar tendon; primary                                                                                                                                                                     |
| 27385           | 2          | Suture of quadriceps or hamstring muscle rupture; primary                                                                                                                                                   |

| <b>CPT Code</b> | <b>OSS</b> | <b>CPT Description</b>                                                                                                                                                |
|-----------------|------------|-----------------------------------------------------------------------------------------------------------------------------------------------------------------------|
| 27427           | 2          | Ligamentous reconstruction (augmentation), knee; extra-articular                                                                                                      |
| 27428           | 2          | Ligamentous reconstruction (augmentation), knee; intra-articular (open)                                                                                               |
| 27430           | 2          | Quadricepsplasty (eg, Bennett or Thompson type)                                                                                                                       |
| 27438           | 2          | Arthroplasty, patella; with prosthesis                                                                                                                                |
| 27446           | 2          | Arthroplasty, knee, condyle and plateau; medial OR lateral compartment                                                                                                |
| 27447           | 2          | Arthroplasty, knee, condyle and plateau; medial AND lateral compartments with or without patella resurfacing (total knee arthroplasty)                                |
| 27486           | 3          | Revision of total knee arthroplasty, with or without allograft; 1 component                                                                                           |
| 27487           | 3          | Revision of total knee arthroplasty, with or without allograft; femoral and entire tibial component                                                                   |
| 27488           | 3          | Removal of prosthesis, including total knee prosthesis, methylmethacrylate with or without insertion of spacer, knee                                                  |
| 27506           | 3          | Open treatment of femoral shaft fracture, with or without external fixation, with insertion of intramedullary implant, with or without cerclage and/or locking screws |
| 27514           | 3          | Open treatment of femoral fracture, distal end, medial or lateral condyle, includes internal fixation, when performed                                                 |
| 27524           | 2          | Open treatment of patellar fracture, with internal fixation and/or partial or complete patellectomy and soft tissue repair                                            |
| 27535           | 3          | Open treatment of tibial fracture, proximal (plateau); unicondylar, includes internal fixation, when performed                                                        |
| 27590           | 3          | Amputation, thigh, through femur, any level;                                                                                                                          |
| 27592           | 3          | Amputation, thigh, through femur, any level; open, circular (guillotine)                                                                                              |
| 27594           | 3          | Amputation, thigh, through femur, any level; secondary closure or scar revision                                                                                       |
| 27596           | 3          | Amputation, thigh, through femur, any level; re-amputation                                                                                                            |
| 27598           | 3          | Disarticulation at knee                                                                                                                                               |
| 27599           | 2          | Unlisted procedure, femur or knee                                                                                                                                     |
| 27602           | 2          | Decompression fasciotomy, leg; anterior and/or lateral, and posterior compartment(s)                                                                                  |
| 27603           | 2          | Incision and drainage, leg or ankle; deep abscess or hematoma                                                                                                         |
| 27610           | 2          | Arthrotomy, ankle, including exploration, drainage, or removal of foreign body                                                                                        |
| 27620           | 2          | Arthrotomy, ankle, with joint exploration, with or without biopsy, with or without removal of loose or foreign body                                                   |
| 27630           | 2          | Excision of lesion of tendon sheath or capsule (eg, cyst or ganglion), leg and/or ankle                                                                               |
| 27635           | 2          | Excision or curettage of bone cyst or benign tumor, tibia or fibula;                                                                                                  |
| 27650           | 2          | Repair, primary, open or percutaneous, ruptured Achilles tendon;                                                                                                      |
| 27652           | 2          | Repair, primary, open or percutaneous, ruptured Achilles tendon; with graft (includes obtaining graft)                                                                |
| 27654           | 2          | Repair, secondary, Achilles tendon, with or without graft                                                                                                             |
| 27675           | 2          | Repair, dislocating peroneal tendons; without fibular osteotomy                                                                                                       |
| 27685           | 2          | Lengthening or shortening of tendon, leg or ankle; single tendon (separate procedure)                                                                                 |
| 27687           | 1          | Gastrocnemius recession (eg, Strayer procedure)                                                                                                                       |
| 27695           | 1          | Repair, primary, disrupted ligament, ankle; collateral                                                                                                                |
| 27698           | 1          | Repair, secondary, disrupted ligament, ankle, collateral (eg, Watson-Jones procedure)                                                                                 |
| 27702           | 2          | Arthroplasty, ankle; with implant (total ankle)                                                                                                                       |
| 27704           | 2          | Removal of ankle implant                                                                                                                                              |
| 27759           | 2          | Treatment of tibial shaft fracture (with or without fibular fracture) by intramedullary implant, with or without interlocking screws and/or cerclage                  |
| 27766           | 2          | Open treatment of medial malleolus fracture, includes internal fixation, when performed                                                                               |
| 27792           | 2          | Open treatment of distal fibular fracture (lateral malleolus), includes internal fixation, when performed                                                             |

| <b>CPT Code</b> | <b>OSS</b> | <b>CPT Description</b>                                                                                                                                                                                                      |
|-----------------|------------|-----------------------------------------------------------------------------------------------------------------------------------------------------------------------------------------------------------------------------|
| 27814           | 2          | Open treatment of bimalleolar ankle fracture (eg, lateral and medial malleoli, or lateral and posterior malleoli, or medial and posterior malleoli), includes internal fixation, when performed                             |
| 27822           | 2          | Open treatment of trimalleolar ankle fracture, includes internal fixation, when performed, medial and/or lateral malleolus; without fixation of posterior lip                                                               |
| 27827           | 2          | Open treatment of fracture of weight bearing articular surface/portion of distal tibia (eg, pilon or tibial plafond), with internal fixation, when performed; of tibia only                                                 |
| 27829           | 2          | Open treatment of distal tibiofibular joint (syndesmosis) disruption, includes internal fixation, when performed                                                                                                            |
| 27870           | 2          | Arthrodesis, ankle, open                                                                                                                                                                                                    |
| 27880           | 3          | Amputation, leg, through tibia and fibula                                                                                                                                                                                   |
| 27881           | 3          | Amputation, leg, through tibia and fibula; with immediate fitting technique including application of first cast                                                                                                             |
| 27882           | 3          | Amputation, leg, through tibia and fibula; open, circular (guillotine)                                                                                                                                                      |
| 27884           | 2          | Amputation, leg, through tibia and fibula; secondary closure or scar revision                                                                                                                                               |
| 27886           | 3          | Amputation, leg, through tibia and fibula; re-amputation                                                                                                                                                                    |
| 27888           | 2          | Amputation, ankle, through malleoli of tibia and fibula (eg, Syme, Pirogoff type procedures), with plastic closure and resection of nerves                                                                                  |
| 27889           | 2          | Ankle disarticulation                                                                                                                                                                                                       |
| 28002           | 2          | Incision and drainage below fascia, with or without tendon sheath involvement, foot; single bursal space                                                                                                                    |
| 28035           | 1          | Release, tarsal tunnel (posterior tibial nerve decompression)                                                                                                                                                               |
| 28800           | 2          | Amputation, foot; midtarsal (eg, Chopart type procedure)                                                                                                                                                                    |
| 29806           | 2          | Arthroscopy, shoulder, surgical; capsulorrhaphy                                                                                                                                                                             |
| 29807           | 2          | Arthroscopy, shoulder, surgical; repair of SLAP lesion                                                                                                                                                                      |
| 29822           | 2          | Arthroscopy, shoulder, surgical; debridement, limited                                                                                                                                                                       |
| 29823           | 2          | Arthroscopy, shoulder, surgical; debridement, extensive                                                                                                                                                                     |
| 29824           | 2          | Arthroscopy, shoulder, surgical; distal claviclectomy including distal articular surface (Mumford procedure)                                                                                                                |
| 29825           | 2          | Arthroscopy, shoulder, surgical; with lysis and resection of adhesions, with or without manipulation                                                                                                                        |
| 29826           | 2          | Arthroscopy, shoulder, surgical; decompression of subacromial space with partial acromioplasty, with coracoacromial ligament (ie, arch) release, when performed (List separately in addition to code for primary procedure) |
| 29827           | 2          | Arthroscopy, shoulder, surgical; with rotator cuff repair                                                                                                                                                                   |
| 29828           | 2          | Arthroscopy, shoulder, surgical; biceps tenodesis                                                                                                                                                                           |
| 29846           | 1          | Arthroscopy, wrist, surgical; excision and/or repair of triangular fibrocartilage and/or joint debridement                                                                                                                  |
| 29870           | 2          | Arthroscopy, knee, diagnostic, with or without synovial biopsy (separate procedure)                                                                                                                                         |
| 29871           | 2          | Arthroscopy, knee, surgical; for infection, lavage and drainage                                                                                                                                                             |
| 29873           | 2          | Arthroscopy, knee, surgical; with lateral release                                                                                                                                                                           |
| 29874           | 2          | Arthroscopy, knee, surgical; for removal of loose body or foreign body (eg, osteochondritis dissecans fragmentation, chondral fragmentation)                                                                                |
| 29875           | 2          | Arthroscopy, knee, surgical; synovectomy, limited (eg, plica or shelf resection) (separate procedure)                                                                                                                       |
| 29876           | 2          | Arthroscopy, knee, surgical; synovectomy, major, 2 or more compartments (eg, medial or lateral)                                                                                                                             |
| 29877           | 2          | Arthroscopy, knee, surgical; debridement/shaving of articular cartilage (chondroplasty)                                                                                                                                     |
| 29879           | 2          | Arthroscopy, knee, surgical; abrasion arthroplasty (includes chondroplasty where necessary) or multiple drilling or microfracture                                                                                           |

| <b>CPT Code</b> | <b>OSS</b> | <b>CPT Description</b>                                                                                                                                                                                                    |
|-----------------|------------|---------------------------------------------------------------------------------------------------------------------------------------------------------------------------------------------------------------------------|
| 29880           | 2          | Arthroscopy, knee, surgical; with meniscectomy (medial AND lateral, including any meniscal shaving) including debridement/shaving of articular cartilage (chondroplasty), same or separate compartment(s), when performed |
| 29881           | 2          | Arthroscopy, knee, surgical; with meniscectomy (medial OR lateral, including any meniscal shaving) including debridement/shaving of articular cartilage (chondroplasty), same or separate compartment(s), when performed  |
| 29882           | 2          | Arthroscopy, knee, surgical; with meniscus repair (medial OR lateral)                                                                                                                                                     |
| 29883           | 2          | Arthroscopy, knee, surgical; with meniscus repair (medial AND lateral)                                                                                                                                                    |
| 29884           | 2          | Arthroscopy, knee, surgical; with lysis of adhesions, with or without manipulation (separate procedure)                                                                                                                   |
| 29888           | 2          | Arthroscopically aided anterior cruciate ligament repair/augmentation or reconstruction                                                                                                                                   |
| 29891           | 2          | Arthroscopy, ankle, surgical, excision of osteochondral defect of talus and/or tibia, including drilling of the defect                                                                                                    |
| 29893           | 1          | Endoscopic plantar fasciotomy                                                                                                                                                                                             |
| 29895           | 1          | Arthroscopy, ankle (tibiotalar and fibulotalar joints), surgical; synovectomy, partial                                                                                                                                    |
| 29897           | 1          | Arthroscopy, ankle (tibiotalar and fibulotalar joints), surgical; debridement, limited                                                                                                                                    |
| 29898           | 1          | Arthroscopy, ankle (tibiotalar and fibulotalar joints), surgical; debridement, extensive                                                                                                                                  |
| 29999           | 2          | Unlisted procedure, arthroscopy                                                                                                                                                                                           |
| 30420           | 2          | Rhinoplasty, primary; including major septal repair                                                                                                                                                                       |
| 30520           | 2          | Septoplasty or submucous resection, with or without cartilage scoring, contouring or replacement with graft                                                                                                               |
| 31276           | 2          | Nasal/sinus endoscopy, surgical with frontal sinus exploration, with or without removal of tissue from frontal sinus                                                                                                      |
| 31360           | 4          | Laryngectomy; total, without radical neck dissection                                                                                                                                                                      |
| 31365           | 4          | Laryngectomy; total, with radical neck dissection                                                                                                                                                                         |
| 31599           | 2          | Unlisted procedure, larynx                                                                                                                                                                                                |
| 31611           | 1          | Construction of tracheoesophageal fistula and subsequent insertion of an alaryngeal speech prosthesis (eg, voice button, Blom-Singer prosthesis)                                                                          |
| 31622           | 1          | Bronchoscopy, rigid or flexible, including fluoroscopic guidance, when performed; diagnostic, with cell washing, when performed (separate procedure)                                                                      |
| 31820           | 1          | Surgical closure tracheostomy or fistula; without plastic repair                                                                                                                                                          |
| 32100           | 4          | Thoracotomy; with exploration                                                                                                                                                                                             |
| 32120           | 5          | Thoracotomy; for postoperative complications                                                                                                                                                                              |
| 32220           | 4          | Decortication, pulmonary (separate procedure); total                                                                                                                                                                      |
| 32225           | 3          | Decortication, pulmonary (separate procedure); partial                                                                                                                                                                    |
| 32320           | 4          | Decortication and parietal pleurectomy                                                                                                                                                                                    |
| 32440           | 5          | Removal of lung, pneumonectomy;                                                                                                                                                                                           |
| 32480           | 4          | Removal of lung, other than pneumonectomy; single lobe (lobectomy)                                                                                                                                                        |
| 32482           | 4          | Removal of lung, other than pneumonectomy; 2 lobes (bilobectomy)                                                                                                                                                          |
| 32484           | 4          | Removal of lung, other than pneumonectomy; single segment (segmentectomy)                                                                                                                                                 |
| 32505           | 4          | Thoracotomy; with therapeutic wedge resection (eg, mass, nodule), initial                                                                                                                                                 |
| 32650           | 3          | Thoracoscopy, surgical; with pleurodesis (eg, mechanical or chemical)                                                                                                                                                     |
| 32651           | 4          | Thoracoscopy, surgical; with partial pulmonary decortication                                                                                                                                                              |
| 32652           | 4          | Thoracoscopy, surgical; with total pulmonary decortication, including intrapleural pneumolysis                                                                                                                            |
| 32655           | 4          | Thoracoscopy, surgical; with resection-plication of bullae, includes any pleural procedure when performed                                                                                                                 |
| 32663           | 4          | Thoracoscopy, surgical; with lobectomy (single lobe)                                                                                                                                                                      |
| 32666           | 3          | Thoracoscopy, surgical; with therapeutic wedge resection (eg, mass, nodule), initial unilateral                                                                                                                           |

| <b>CPT Code</b> | <b>OSS</b> | <b>CPT Description</b>                                                                                                                                                                                                                                             |
|-----------------|------------|--------------------------------------------------------------------------------------------------------------------------------------------------------------------------------------------------------------------------------------------------------------------|
| 32669           | 3          | Thoracoscopy, surgical; with removal of a single lung segment (segmentectomy)                                                                                                                                                                                      |
| 33025           | 3          | Creation of pericardial window or partial resection for drainage                                                                                                                                                                                                   |
| 34201           | 2          | Embolectomy or thrombectomy, with or without catheter; femoropopliteal, aortoiliac artery, by leg incision                                                                                                                                                         |
| 34800           | 2          | Endovascular repair of infrarenal abdominal aortic aneurysm or dissection; using aorto-aortic tube prosthesis                                                                                                                                                      |
| 34802           | 3          | Endovascular repair of infrarenal abdominal aortic aneurysm or dissection; using modular bifurcated prosthesis (1 docking limb)                                                                                                                                    |
| 34803           | 3          | Endovascular repair of infrarenal abdominal aortic aneurysm or dissection; using modular bifurcated prosthesis (2 docking limbs)                                                                                                                                   |
| 34804           | 3          | Endovascular repair of infrarenal abdominal aortic aneurysm or dissection; using unibody bifurcated prosthesis                                                                                                                                                     |
| 34805           | 3          | Endovascular repair of infrarenal abdominal aortic aneurysm or dissection; using aorto-uniiliac or aorto-unifemoral prosthesis                                                                                                                                     |
| 34812           | 2          | Open femoral artery exposure for delivery of endovascular prosthesis, by groin incision, unilateral                                                                                                                                                                |
| 34825           | 2          | Placement of proximal or distal extension prosthesis for endovascular repair of infrarenal abdominal aortic or iliac aneurysm, false aneurysm, or dissection; initial vessel                                                                                       |
| 34900           | 2          | Endovascular repair of iliac artery (eg, aneurysm, pseudoaneurysm, arteriovenous malformation, trauma) using ilio-iliac tube endoprosthesis                                                                                                                        |
| 35081           | 5          | Direct repair of aneurysm, pseudoaneurysm, or excision (partial or total) and graft insertion, with or without patch graft; for aneurysm, pseudoaneurysm, and associated occlusive disease, abdominal aorta                                                        |
| 35091           | 5          | Direct repair of aneurysm, pseudoaneurysm, or excision (partial or total) and graft insertion, with or without patch graft; for aneurysm, pseudoaneurysm, and associated occlusive disease, abdominal aorta involving visceral vessels (mesenteric, celiac, renal) |
| 35102           | 5          | Direct repair of aneurysm, pseudoaneurysm, or excision (partial or total) and graft insertion, with or without patch graft; for aneurysm, pseudoaneurysm, and associated occlusive disease, abdominal aorta involving iliac vessels (common, hypogastric, exter    |
| 35141           | 3          | Direct repair of aneurysm, pseudoaneurysm, or excision (partial or total) and graft insertion, with or without patch graft; for aneurysm, pseudoaneurysm, and associated occlusive disease, common femoral artery (profunda femoris, superficial femoral)          |
| 35151           | 3          | Direct repair of aneurysm, pseudoaneurysm, or excision (partial or total) and graft insertion, with or without patch graft; for aneurysm, pseudoaneurysm, and associated occlusive disease, popliteal artery                                                       |
| 35226           | 2          | Repair blood vessel, direct; lower extremity                                                                                                                                                                                                                       |
| 35301           | 3          | Thromboendarterectomy, including patch graft, if performed; carotid, vertebral, subclavian, by neck incision                                                                                                                                                       |
| 35302           | 2          | Thromboendarterectomy, including patch graft, if performed; superficial femoral artery                                                                                                                                                                             |
| 35371           | 2          | Thromboendarterectomy, including patch graft, if performed; common femoral                                                                                                                                                                                         |
| 35372           | 2          | Thromboendarterectomy, including patch graft, if performed; deep (profunda) femoral                                                                                                                                                                                |
| 35540           | 4          | Bypass graft, with vein; aortobifemoral                                                                                                                                                                                                                            |
| 35556           | 3          | Bypass graft, with vein; femoral-popliteal                                                                                                                                                                                                                         |
| 35558           | 3          | Bypass graft, with vein; femoral-femoral                                                                                                                                                                                                                           |
| 35566           | 3          | Bypass graft, with vein; femoral-anterior tibial, posterior tibial, peroneal artery or other distal vessels                                                                                                                                                        |
| 35571           | 3          | Bypass graft, with vein; popliteal-tibial, -peroneal artery or other distal vessels                                                                                                                                                                                |
| 35583           | 3          | In-situ vein bypass; femoral-popliteal                                                                                                                                                                                                                             |
| 35585           | 3          | In-situ vein bypass; femoral-anterior tibial, posterior tibial, or peroneal artery                                                                                                                                                                                 |
| 35606           | 3          | Bypass graft, with other than vein; carotid-subclavian                                                                                                                                                                                                             |
| 35621           | 3          | Bypass graft, with other than vein; axillary-femoral                                                                                                                                                                                                               |

| <b>CPT Code</b> | <b>OSS</b> | <b>CPT Description</b>                                                                                                                                                                                                   |
|-----------------|------------|--------------------------------------------------------------------------------------------------------------------------------------------------------------------------------------------------------------------------|
| 35646           | 4          | Bypass graft, with other than vein; aortobifemoral                                                                                                                                                                       |
| 35654           | 3          | Bypass graft, with other than vein; axillary-femoral-femoral                                                                                                                                                             |
| 35656           | 3          | Bypass graft, with other than vein; femoral-popliteal                                                                                                                                                                    |
| 35661           | 3          | Bypass graft, with other than vein; femoral-femoral                                                                                                                                                                      |
| 35665           | 3          | Bypass graft, with other than vein; iliofemoral                                                                                                                                                                          |
| 35666           | 3          | Bypass graft, with other than vein; femoral-anterior tibial, posterior tibial, or peroneal artery                                                                                                                        |
| 35800           | 3          | Exploration for postoperative hemorrhage, thrombosis or infection; neck                                                                                                                                                  |
| 35820           | 4          | Exploration for postoperative hemorrhage, thrombosis or infection; chest                                                                                                                                                 |
| 35840           | 4          | Exploration for postoperative hemorrhage, thrombosis or infection; abdomen                                                                                                                                               |
| 35860           | 3          | Exploration for postoperative hemorrhage, thrombosis or infection; extremity                                                                                                                                             |
| 35875           | 1          | Thrombectomy of arterial or venous graft (other than hemodialysis graft or fistula);                                                                                                                                     |
| 35876           | 2          | Thrombectomy of arterial or venous graft (other than hemodialysis graft or fistula); with revision of arterial or venous graft                                                                                           |
| 35879           | 2          | Revision, lower extremity arterial bypass, without thrombectomy, open; with vein patch angioplasty                                                                                                                       |
| 35883           | 2          | Revision, femoral anastomosis of synthetic arterial bypass graft in groin, open; with nonautogenous patch graft (eg, Dacron, ePTFE, bovine pericardium)                                                                  |
| 35903           | 2          | Excision of infected graft; extremity                                                                                                                                                                                    |
| 36246           | 1          | Selective catheter placement, arterial system; initial second order abdominal, pelvic, or lower extremity artery branch, within a vascular family                                                                        |
| 36247           | 1          | Selective catheter placement, arterial system; initial third order or more selective abdominal, pelvic, or lower extremity artery branch, within a vascular family                                                       |
| 36475           | 1          | Endovenous ablation therapy of incompetent vein, extremity, inclusive of all imaging guidance and monitoring, percutaneous, radiofrequency; first vein treated                                                           |
| 36478           | 1          | Endovenous ablation therapy of incompetent vein, extremity, inclusive of all imaging guidance and monitoring, percutaneous, laser; first vein treated                                                                    |
| 36561           | 1          | Insertion of tunneled centrally inserted central venous access device, with subcutaneous port; age 5 years or older                                                                                                      |
| 37215           | 2          | Transcatheter placement of intravascular stent(s), cervical carotid artery, open or percutaneous, including angioplasty, when performed, and radiological supervision and interpretation; with distal embolic protection |
| 37220           | 2          | Revascularization, endovascular, open or percutaneous, iliac artery, unilateral, initial vessel; with transluminal angioplasty                                                                                           |
| 37221           | 2          | Revascularization, endovascular, open or percutaneous, iliac artery, unilateral, initial vessel; with transluminal stent placement(s), includes angioplasty within the same vessel, when performed                       |
| 37224           | 2          | Revascularization, endovascular, open or percutaneous, femoral, popliteal artery(s), unilateral; with transluminal angioplasty                                                                                           |
| 37226           | 2          | Revascularization, endovascular, open or percutaneous, femoral, popliteal artery(s), unilateral; with transluminal stent placement(s), includes angioplasty within the same vessel, when performed                       |
| 37228           | 2          | Revascularization, endovascular, open or percutaneous, tibial, peroneal artery, unilateral, initial vessel; with transluminal angioplasty                                                                                |
| 37722           | 1          | Ligation, division, and stripping, long (greater) saphenous veins from saphenofemoral junction to knee or below                                                                                                          |
| 37765           | 1          | Stab phlebectomy of varicose veins, 1 extremity; 10-20 stab incisions                                                                                                                                                    |
| 37766           | 2          | Stab phlebectomy of varicose veins, 1 extremity; more than 20 incisions                                                                                                                                                  |
| 37799           | 2          | Unlisted procedure, vascular surgery                                                                                                                                                                                     |
| 38100           | 3          | Splenectomy; total (separate procedure)                                                                                                                                                                                  |
| 38120           | 3          | Laparoscopy, surgical, splenectomy                                                                                                                                                                                       |

| <b>CPT Code</b> | <b>OSS</b> | <b>CPT Description</b>                                                                                                                                                                                         |
|-----------------|------------|----------------------------------------------------------------------------------------------------------------------------------------------------------------------------------------------------------------|
| 38720           | 2          | Cervical lymphadenectomy (complete)                                                                                                                                                                            |
| 38724           | 3          | Cervical lymphadenectomy (modified radical neck dissection)                                                                                                                                                    |
| 38740           | 2          | Axillary lymphadenectomy; superficial                                                                                                                                                                          |
| 38745           | 3          | Axillary lymphadenectomy; complete                                                                                                                                                                             |
| 38760           | 2          | Inguinofemoral lymphadenectomy, superficial, including cloquets node (separate procedure)                                                                                                                      |
| 39010           | 3          | Mediastinotomy with exploration, drainage, removal of foreign body, or biopsy; transthoracic approach, including either transthoracic or median sternotomy                                                     |
| 39400           | 2          | Mediastinoscopy, includes biopsy(ies), when performed                                                                                                                                                          |
| 40510           | 1          | Excision of lip; transverse wedge excision with primary closure                                                                                                                                                |
| 40812           | 1          | Excision of lesion of mucosa and submucosa, vestibule of mouth; with simple repair                                                                                                                             |
| 41110           | 1          | Excision of lesion of tongue without closure                                                                                                                                                                   |
| 41112           | 1          | Excision of lesion of tongue with closure; anterior two-thirds                                                                                                                                                 |
| 41116           | 2          | Excision, lesion of floor of mouth                                                                                                                                                                             |
| 41120           | 2          | Glossectomy; less than one-half tongue                                                                                                                                                                         |
| 41135           | 3          | Glossectomy; partial, with unilateral radical neck dissection                                                                                                                                                  |
| 41155           | 4          | Glossectomy; composite procedure with resection floor of mouth, mandibular resection, and radical neck dissection (Commando type)                                                                              |
| 42104           | 2          | Excision, lesion of palate, uvula; without closure                                                                                                                                                             |
| 42140           | 2          | Uvulectomy, excision of uvula                                                                                                                                                                                  |
| 42145           | 2          | Palatopharyngoplasty (eg, uvulopalatopharyngoplasty, uvulopharyngoplasty)                                                                                                                                      |
| 42410           | 2          | Excision of parotid tumor or parotid gland; lateral lobe, without nerve dissection                                                                                                                             |
| 42415           | 2          | Excision of parotid tumor or parotid gland; lateral lobe, with dissection and preservation of facial nerve                                                                                                     |
| 42420           | 2          | Excision of parotid tumor or parotid gland; total, with dissection and preservation of facial nerve                                                                                                            |
| 42426           | 3          | Excision of parotid tumor or parotid gland; total, with unilateral radical neck dissection                                                                                                                     |
| 42440           | 2          | Excision of submandibular (submaxillary) gland                                                                                                                                                                 |
| 42808           | 2          | Excision or destruction of lesion of pharynx, any method                                                                                                                                                       |
| 42826           | 2          | Tonsillectomy, primary or secondary; age 12 or over                                                                                                                                                            |
| 43107           | 5          | Total or near total esophagectomy, without thoracotomy; with pharyngogastrostomy or cervical esophagogastrostomy, with or without pyloroplasty (transhiatal)                                                   |
| 43112           | 5          | Total or near total esophagectomy, with thoracotomy; with pharyngogastrostomy or cervical esophagogastrostomy, with or without pyloroplasty                                                                    |
| 43117           | 5          | Partial esophagectomy, distal two-thirds, with thoracotomy and separate abdominal incision, with or without proximal gastrectomy; with thoracic esophagogastrostomy, with or without pyloroplasty (Ivor Lewis) |
| 43130           | 3          | Diverticulectomy of hypopharynx or esophagus, with or without myotomy; cervical approach                                                                                                                       |
| 43279           | 2          | Laparoscopy, surgical, esophagomyotomy (Heller type), with fundoplasty, when performed                                                                                                                         |
| 43280           | 3          | Laparoscopy, surgical, esophagogastric fundoplasty (eg, Nissen, Toupet procedures)                                                                                                                             |
| 43281           | 3          | Laparoscopy, surgical, repair of paraesophageal hernia, includes fundoplasty, when performed; without implantation of mesh                                                                                     |
| 43282           | 3          | Laparoscopy, surgical, repair of paraesophageal hernia, includes fundoplasty, when performed; with implantation of mesh                                                                                        |
| 43610           | 3          | Excision, local; ulcer or benign tumor of stomach                                                                                                                                                              |
| 43631           | 4          | Gastrectomy, partial, distal; with gastroduodenostomy                                                                                                                                                          |
| 43632           | 4          | Gastrectomy, partial, distal; with gastrojejunostomy                                                                                                                                                           |
| 43633           | 4          | Gastrectomy, partial, distal; with Roux-en-Y reconstruction                                                                                                                                                    |
| 43644           | 3          | Laparoscopy, surgical, gastric restrictive procedure; with gastric bypass and Roux-en-Y gastroenterostomy (roux limb 150 cm or less)                                                                           |

| <b>CPT Code</b> | <b>OSS</b> | <b>CPT Description</b>                                                                                                                                    |
|-----------------|------------|-----------------------------------------------------------------------------------------------------------------------------------------------------------|
| 43659           | 3          | Unlisted laparoscopy procedure, stomach                                                                                                                   |
| 43775           | 3          | Laparoscopy, surgical, gastric restrictive procedure; longitudinal gastrectomy (ie, sleeve gastrectomy)                                                   |
| 43820           | 3          | Gastrojejunostomy; without vagotomy                                                                                                                       |
| 43840           | 3          | Gastrorrhaphy, suture of perforated duodenal or gastric ulcer, wound, or injury                                                                           |
| 44005           | 3          | Enterolysis (freeing of intestinal adhesion) (separate procedure)                                                                                         |
| 44050           | 3          | Reduction of volvulus, intussusception, internal hernia, by laparotomy                                                                                    |
| 44120           | 3          | Enterectomy, resection of small intestine; single resection and anastomosis                                                                               |
| 44125           | 3          | Enterectomy, resection of small intestine; with enterostomy                                                                                               |
| 44130           | 3          | Enteroenterostomy, anastomosis of intestine, with or without cutaneous enterostomy (separate procedure)                                                   |
| 44140           | 4          | Colectomy, partial; with anastomosis                                                                                                                      |
| 44141           | 4          | Colectomy, partial; with skin level cecostomy or colostomy                                                                                                |
| 44143           | 4          | Colectomy, partial; with end colostomy and closure of distal segment (Hartmann type procedure)                                                            |
| 44144           | 4          | Colectomy, partial; with resection, with colostomy or ileostomy and creation of mucofistula                                                               |
| 44145           | 4          | Colectomy, partial; with coloproctostomy (low pelvic anastomosis)                                                                                         |
| 44146           | 4          | Colectomy, partial; with coloproctostomy (low pelvic anastomosis), with colostomy                                                                         |
| 44150           | 4          | Colectomy, total, abdominal, without proctectomy; with ileostomy or ileoproctostomy                                                                       |
| 44155           | 4          | Colectomy, total, abdominal, with proctectomy; with ileostomy                                                                                             |
| 44160           | 4          | Colectomy, partial, with removal of terminal ileum with ileocolostomy                                                                                     |
| 44180           | 3          | Laparoscopy, surgical, enterolysis (freeing of intestinal adhesion) (separate procedure)                                                                  |
| 44188           | 3          | Laparoscopy, surgical, colostomy or skin level cecostomy                                                                                                  |
| 44202           | 3          | Laparoscopy, surgical; enterectomy, resection of small intestine, single resection and anastomosis                                                        |
| 44204           | 3          | Laparoscopy, surgical; colectomy, partial, with anastomosis                                                                                               |
| 44205           | 3          | Laparoscopy, surgical; colectomy, partial, with removal of terminal ileum with ileocolostomy                                                              |
| 44206           | 3          | Laparoscopy, surgical; colectomy, partial, with end colostomy and closure of distal segment (Hartmann type procedure)                                     |
| 44207           | 3          | Laparoscopy, surgical; colectomy, partial, with anastomosis, with coloproctostomy (low pelvic anastomosis)                                                |
| 44227           | 3          | Laparoscopy, surgical, closure of enterostomy, large or small intestine, with resection and anastomosis                                                   |
| 44310           | 3          | Ileostomy or jejunostomy, non-tube                                                                                                                        |
| 44312           | 2          | Revision of ileostomy; simple (release of superficial scar) (separate procedure)                                                                          |
| 44314           | 3          | Revision of ileostomy; complicated (reconstruction in-depth) (separate procedure)                                                                         |
| 44320           | 3          | Colostomy or skin level cecostomy;                                                                                                                        |
| 44340           | 2          | Revision of colostomy; simple (release of superficial scar) (separate procedure)                                                                          |
| 44345           | 3          | Revision of colostomy; complicated (reconstruction in-depth) (separate procedure)                                                                         |
| 44346           | 3          | Revision of colostomy; with repair of paracolostomy hernia (separate procedure)                                                                           |
| 44602           | 3          | Suture of small intestine (enterorrhaphy) for perforated ulcer, diverticulum, wound, injury or rupture; single perforation                                |
| 44604           | 3          | Suture of large intestine (colorrhaphy) for perforated ulcer, diverticulum, wound, injury or rupture (single or multiple perforations); without colostomy |
| 44620           | 3          | Closure of enterostomy, large or small intestine;                                                                                                         |
| 44625           | 3          | Closure of enterostomy, large or small intestine; with resection and anastomosis other than colorectal                                                    |
| 44626           | 3          | Closure of enterostomy, large or small intestine; with resection and colorectal anastomosis (eg, closure of Hartmann type procedure)                      |

| <b>CPT Code</b> | <b>OSS</b> | <b>CPT Description</b>                                                                                                                                                                               |
|-----------------|------------|------------------------------------------------------------------------------------------------------------------------------------------------------------------------------------------------------|
| 44640           | 4          | Closure of intestinal cutaneous fistula                                                                                                                                                              |
| 44661           | 4          | Closure of enterovesical fistula; with intestine and/or bladder resection                                                                                                                            |
| 44950           | 2          | Appendectomy;                                                                                                                                                                                        |
| 44960           | 3          | Appendectomy; for ruptured appendix with abscess or generalized peritonitis                                                                                                                          |
| 44970           | 2          | Laparoscopy, surgical, appendectomy                                                                                                                                                                  |
| 45005           | 2          | Incision and drainage of submucosal abscess, rectum                                                                                                                                                  |
| 45110           | 4          | Proctectomy; complete, combined abdominoperineal, with colostomy                                                                                                                                     |
| 45111           | 4          | Proctectomy; partial resection of rectum, transabdominal approach                                                                                                                                    |
| 45395           | 4          | Laparoscopy, surgical; proctectomy, complete, combined abdominoperineal, with colostomy                                                                                                              |
| 46020           | 1          | Placement of seton                                                                                                                                                                                   |
| 46040           | 1          | Incision and drainage of ischiorectal and/or perirectal abscess (separate procedure)                                                                                                                 |
| 46045           | 1          | Incision and drainage of intramural, intramuscular, or submucosal abscess, transanal, under anesthesia                                                                                               |
| 46060           | 1          | Incision and drainage of ischiorectal or intramural abscess, with fistulectomy or fistulotomy, submuscular, with or without placement of seton                                                       |
| 46270           | 1          | Surgical treatment of anal fistula (fistulectomy/fistulotomy); subcutaneous                                                                                                                          |
| 46947           | 1          | Hemorrhoidopexy (eg, for prolapsing internal hemorrhoids) by stapling                                                                                                                                |
| 46999           | 1          | Unlisted procedure, anus                                                                                                                                                                             |
| 47120           | 4          | Hepatectomy, resection of liver; partial lobectomy                                                                                                                                                   |
| 47135           | 5          | Liver allotransplantation; orthotopic, partial or whole, from cadaver or living donor, any age                                                                                                       |
| 47370           | 3          | Laparoscopy, surgical, ablation of 1 or more liver tumor(s); radiofrequency                                                                                                                          |
| 47379           | 3          | Unlisted laparoscopic procedure, liver                                                                                                                                                               |
| 47562           | 3          | Laparoscopy, surgical; cholecystectomy                                                                                                                                                               |
| 47563           | 3          | Laparoscopy, surgical; cholecystectomy with cholangiography                                                                                                                                          |
| 47564           | 3          | Laparoscopy, surgical; cholecystectomy with exploration of common duct                                                                                                                               |
| 47600           | 3          | Cholecystectomy;                                                                                                                                                                                     |
| 47605           | 3          | Cholecystectomy; with cholangiography                                                                                                                                                                |
| 47610           | 3          | Cholecystectomy with exploration of common duct;                                                                                                                                                     |
| 48140           | 4          | Pancreatectomy, distal subtotal, with or without splenectomy; without pancreaticojejunostomy                                                                                                         |
| 48150           | 5          | Pancreatectomy, proximal subtotal with total duodenectomy, partial gastrectomy, choledochoenterostomy and gastrojejunostomy (Whipple-type procedure); with pancreaticojejunostomy                    |
| 48153           | 5          | Pancreatectomy, proximal subtotal with near-total duodenectomy, choledochoenterostomy and duodenojejunostomy (pylorus-sparing, Whipple-type procedure); with pancreaticojejunostomy                  |
| 49000           | 3          | Exploratory laparotomy, exploratory celiotomy with or without biopsy(s) (separate procedure)                                                                                                         |
| 49002           | 3          | Reopening of recent laparotomy                                                                                                                                                                       |
| 49010           | 3          | Exploration, retroperitoneal area with or without biopsy(s) (separate procedure)                                                                                                                     |
| 49020           | 3          | Drainage of peritoneal abscess or localized peritonitis, exclusive of appendiceal abscess; open                                                                                                      |
| 49203           | 3          | Excision or destruction, open, intra-abdominal tumors, cysts or endometriomas, 1 or more peritoneal, mesenteric, or retroperitoneal primary or secondary tumors; largest tumor 5 cm diameter or less |
| 49321           | 2          | Laparoscopy, surgical; with biopsy (single or multiple)                                                                                                                                              |
| 49324           | 2          | Laparoscopy, surgical; with insertion of tunneled intraperitoneal catheter                                                                                                                           |
| 49329           | 2          | Unlisted laparoscopy procedure, abdomen, peritoneum and omentum                                                                                                                                      |
| 49402           | 2          | Removal of peritoneal foreign body from peritoneal cavity                                                                                                                                            |
| 49505           | 2          | Repair initial inguinal hernia, age 5 years or older; reducible                                                                                                                                      |
| 49507           | 2          | Repair initial inguinal hernia, age 5 years or older; incarcerated or strangulated                                                                                                                   |

| <b>CPT Code</b> | <b>OSS</b> | <b>CPT Description</b>                                                                                                                                                                                 |
|-----------------|------------|--------------------------------------------------------------------------------------------------------------------------------------------------------------------------------------------------------|
| 49520           | 2          | Repair recurrent inguinal hernia, any age; reducible                                                                                                                                                   |
| 49521           | 2          | Repair recurrent inguinal hernia, any age; incarcerated or strangulated                                                                                                                                |
| 49525           | 2          | Repair inguinal hernia, sliding, any age                                                                                                                                                               |
| 49550           | 2          | Repair initial femoral hernia, any age; reducible                                                                                                                                                      |
| 49553           | 3          | Repair initial femoral hernia, any age; incarcerated or strangulated                                                                                                                                   |
| 49560           | 2          | Repair initial incisional or ventral hernia; reducible                                                                                                                                                 |
| 49561           | 3          | Repair initial incisional or ventral hernia; incarcerated or strangulated                                                                                                                              |
| 49565           | 2          | Repair recurrent incisional or ventral hernia; reducible                                                                                                                                               |
| 49566           | 3          | Repair recurrent incisional or ventral hernia; incarcerated or strangulated                                                                                                                            |
| 49570           | 2          | Repair epigastric hernia (eg, preperitoneal fat); reducible (separate procedure)                                                                                                                       |
| 49572           | 2          | Repair epigastric hernia (eg, preperitoneal fat); incarcerated or strangulated                                                                                                                         |
| 49585           | 2          | Repair umbilical hernia, age 5 years or older; reducible                                                                                                                                               |
| 49587           | 3          | Repair umbilical hernia, age 5 years or older; incarcerated or strangulated                                                                                                                            |
| 49590           | 2          | Repair spigelian hernia                                                                                                                                                                                |
| 49650           | 2          | Laparoscopy, surgical; repair initial inguinal hernia                                                                                                                                                  |
| 49651           | 2          | Laparoscopy, surgical; repair recurrent inguinal hernia                                                                                                                                                |
| 49652           | 2          | Laparoscopy, surgical, repair, ventral, umbilical, spigelian or epigastric hernia (includes mesh insertion, when performed); reducible                                                                 |
| 49653           | 2          | Laparoscopy, surgical, repair, ventral, umbilical, spigelian or epigastric hernia (includes mesh insertion, when performed); incarcerated or strangulated                                              |
| 49654           | 2          | Laparoscopy, surgical, repair, incisional hernia (includes mesh insertion, when performed); reducible                                                                                                  |
| 49655           | 3          | Laparoscopy, surgical, repair, incisional hernia (includes mesh insertion, when performed); incarcerated or strangulated                                                                               |
| 49656           | 2          | Laparoscopy, surgical, repair, recurrent incisional hernia (includes mesh insertion, when performed); reducible                                                                                        |
| 49659           | 2          | Unlisted laparoscopy procedure, hernioplasty, herniorrhaphy, herniotomy                                                                                                                                |
| 49900           | 3          | Suture, secondary, of abdominal wall for evisceration or dehiscence                                                                                                                                    |
| 49999           | 3          | Unlisted procedure, abdomen, peritoneum and omentum                                                                                                                                                    |
| 50220           | 3          | Nephrectomy, including partial ureterectomy, any open approach including rib resection;                                                                                                                |
| 50230           | 4          | Nephrectomy, including partial ureterectomy, any open approach including rib resection; radical, with regional lymphadenectomy and/or vena caval thrombectomy                                          |
| 50234           | 4          | Nephrectomy with total ureterectomy and bladder cuff; through same incision                                                                                                                            |
| 50240           | 4          | Nephrectomy, partial                                                                                                                                                                                   |
| 50360           | 3          | Renal allotransplantation, implantation of graft; without recipient nephrectomy                                                                                                                        |
| 50543           | 2          | Laparoscopy, surgical; partial nephrectomy                                                                                                                                                             |
| 50545           | 3          | Laparoscopy, surgical; radical nephrectomy (includes removal of Gerota's fascia and surrounding fatty tissue, removal of regional lymph nodes, and adrenalectomy)                                      |
| 50546           | 3          | Laparoscopy, surgical; nephrectomy, including partial ureterectomy                                                                                                                                     |
| 50548           | 3          | Laparoscopy, surgical; nephrectomy with total ureterectomy                                                                                                                                             |
| 51040           | 2          | Cystostomy, cystotomy with drainage                                                                                                                                                                    |
| 51050           | 2          | Cystolithotomy, cystotomy with removal of calculus, without vesical neck resection                                                                                                                     |
| 51590           | 4          | Cystectomy, complete, with ureteroileal conduit or sigmoid bladder, including intestine anastomosis;                                                                                                   |
| 51595           | 4          | Cystectomy, complete, with ureteroileal conduit or sigmoid bladder, including intestine anastomosis; with bilateral pelvic lymphadenectomy, including external iliac, hypogastric, and obturator nodes |

| <b>CPT Code</b> | <b>OSS</b> | <b>CPT Description</b>                                                                                                                                                                                                                                          |
|-----------------|------------|-----------------------------------------------------------------------------------------------------------------------------------------------------------------------------------------------------------------------------------------------------------------|
| 51596           | 4          | Cystectomy, complete, with continent diversion, any open technique, using any segment of small and/or large intestine to construct neobladder                                                                                                                   |
| 52000           | 1          | Cystourethroscopy (separate procedure)                                                                                                                                                                                                                          |
| 52005           | 1          | Cystourethroscopy, with ureteral catheterization, with or without irrigation, instillation, or ureteropyelography, exclusive of radiologic service;                                                                                                             |
| 52204           | 1          | Cystourethroscopy, with biopsy(s)                                                                                                                                                                                                                               |
| 52224           | 1          | Cystourethroscopy, with fulguration (including cryosurgery or laser surgery) or treatment of MINOR (less than 0.5 cm) lesion(s) with or without biopsy                                                                                                          |
| 52234           | 1          | Cystourethroscopy, with fulguration (including cryosurgery or laser surgery) and/or resection of; SMALL bladder tumor(s) (0.5 up to 2.0 cm)                                                                                                                     |
| 52235           | 1          | Cystourethroscopy, with fulguration (including cryosurgery or laser surgery) and/or resection of; MEDIUM bladder tumor(s) (2.0 to 5.0 cm)                                                                                                                       |
| 52240           | 2          | Cystourethroscopy, with fulguration (including cryosurgery or laser surgery) and/or resection of; LARGE bladder tumor(s)                                                                                                                                        |
| 52317           | 1          | Litholapaxy: crushing or fragmentation of calculus by any means in bladder and removal of fragments; simple or small (less than 2.5 cm)                                                                                                                         |
| 52332           | 1          | Cystourethroscopy, with insertion of indwelling ureteral stent (eg, Gibbons or double-J type)                                                                                                                                                                   |
| 52341           | 1          | Cystourethroscopy; with treatment of ureteral stricture (eg, balloon dilation, laser, electrocautery, and incision)                                                                                                                                             |
| 52344           | 1          | Cystourethroscopy with ureteroscopy; with treatment of ureteral stricture (eg, balloon dilation, laser, electrocautery, and incision)                                                                                                                           |
| 52351           | 1          | Cystourethroscopy, with ureteroscopy and/or pyeloscopy; diagnostic                                                                                                                                                                                              |
| 52353           | 1          | Cystourethroscopy, with ureteroscopy and/or pyeloscopy; with lithotripsy (ureteral catheterization is included)                                                                                                                                                 |
| 52450           | 2          | Transurethral incision of prostate                                                                                                                                                                                                                              |
| 52500           | 1          | Transurethral resection of bladder neck (separate procedure)                                                                                                                                                                                                    |
| 52601           | 2          | Transurethral electrosurgical resection of prostate, including control of postoperative bleeding, complete (vasectomy, meatotomy, cystourethroscopy, urethral calibration and/or dilation, and internal urethrotomy are included)                               |
| 52630           | 2          | Transurethral resection; residual or regrowth of obstructive prostate tissue including control of postoperative bleeding, complete (vasectomy, meatotomy, cystourethroscopy, urethral calibration and/or dilation, and internal urethrotomy are included)       |
| 52640           | 1          | Transurethral resection; of postoperative bladder neck contracture                                                                                                                                                                                              |
| 52648           | 2          | Laser vaporization of prostate, including control of postoperative bleeding, complete (vasectomy, meatotomy, cystourethroscopy, urethral calibration and/or dilation, internal urethrotomy and transurethral resection of prostate are included if performed)   |
| 52649           | 2          | Laser enucleation of the prostate with morcellation, including control of postoperative bleeding, complete (vasectomy, meatotomy, cystourethroscopy, urethral calibration and/or dilation, internal urethrotomy and transurethral resection of prostate are inc |
| 53410           | 2          | Urethroplasty, 1-stage reconstruction of male anterior urethra                                                                                                                                                                                                  |
| 53440           | 2          | Sling operation for correction of male urinary incontinence (eg, fascia or synthetic)                                                                                                                                                                           |
| 53445           | 2          | Insertion of inflatable urethral/bladder neck sphincter, including placement of pump, reservoir, and cuff                                                                                                                                                       |
| 53446           | 2          | Removal of inflatable urethral/bladder neck sphincter, including pump, reservoir, and cuff                                                                                                                                                                      |
| 53447           | 2          | Removal and replacement of inflatable urethral/bladder neck sphincter including pump, reservoir, and cuff at the same operative session                                                                                                                         |
| 53899           | 1          | Unlisted procedure, urinary system                                                                                                                                                                                                                              |
| 54065           | 1          | Destruction of lesion(s), penis (eg, condyloma, papilloma, molluscum contagiosum, herpetic vesicle), extensive (eg, laser surgery, electrosurgery, cryosurgery, chemosurgery)                                                                                   |
| 54120           | 2          | Amputation of penis; partial                                                                                                                                                                                                                                    |
| 54360           | 2          | Plastic operation on penis to correct angulation                                                                                                                                                                                                                |

| <b>CPT Code</b> | <b>OSS</b> | <b>CPT Description</b>                                                                                                                                                                   |
|-----------------|------------|------------------------------------------------------------------------------------------------------------------------------------------------------------------------------------------|
| 54405           | 2          | Insertion of multi-component, inflatable penile prosthesis, including placement of pump, cylinders, and reservoir                                                                        |
| 54840           | 1          | Excision of spermatocele, with or without epididymectomy                                                                                                                                 |
| 54860           | 1          | Epididymectomy; unilateral                                                                                                                                                               |
| 55040           | 1          | Excision of hydrocele; unilateral                                                                                                                                                        |
| 55041           | 1          | Excision of hydrocele; bilateral                                                                                                                                                         |
| 55060           | 1          | Repair of tunica vaginalis hydrocele (Bottle type)                                                                                                                                       |
| 55100           | 1          | Drainage of scrotal wall abscess                                                                                                                                                         |
| 55110           | 1          | Scrotal exploration                                                                                                                                                                      |
| 55530           | 1          | Excision of varicocele or ligation of spermatic veins for varicocele; (separate procedure)                                                                                               |
| 55810           | 4          | Prostatectomy, perineal radical;                                                                                                                                                         |
| 55821           | 3          | Prostatectomy (including control of postoperative bleeding, vasectomy, meatotomy, urethral calibration and/or dilation, and internal urethrotomy); suprapubic, subtotal, 1 or 2 stages   |
| 55831           | 3          | Prostatectomy (including control of postoperative bleeding, vasectomy, meatotomy, urethral calibration and/or dilation, and internal urethrotomy); retropubic, subtotal                  |
| 55840           | 3          | Prostatectomy, retropubic radical, with or without nerve sparing;                                                                                                                        |
| 55842           | 4          | Prostatectomy, retropubic radical, with or without nerve sparing; with lymph node biopsy(s) (limited pelvic lymphadenectomy)                                                             |
| 55845           | 4          | Prostatectomy, retropubic radical, with or without nerve sparing; with bilateral pelvic lymphadenectomy, including external iliac, hypogastric, and obturator nodes                      |
| 55866           | 3          | Laparoscopy, surgical prostatectomy, retropubic radical, including nerve sparing, includes robotic assistance, when performed                                                            |
| 55873           | 2          | Cryosurgical ablation of the prostate (includes ultrasonic guidance and monitoring)                                                                                                      |
| 55876           | 1          | Placement of interstitial device(s) for radiation therapy guidance (eg, fiducial markers, dosimeter), prostate (via needle, any approach), single or multiple                            |
| 57288           | 2          | Sling operation for stress incontinence (eg, fascia or synthetic)                                                                                                                        |
| 57460           | 1          | Colposcopy of the cervix including upper/adjacent vagina; with loop electrode biopsy(s) of the cervix                                                                                    |
| 57522           | 1          | Conization of cervix, with or without fulguration, with or without dilation and curettage, with or without repair; loop electrode excision                                               |
| 58120           | 1          | Dilation and curettage, diagnostic and/or therapeutic (nonobstetrical)                                                                                                                   |
| 58140           | 3          | Myomectomy, excision of fibroid tumor(s) of uterus, 1 to 4 intramural myoma(s) with total weight of 250 g or less and/or removal of surface myomas; abdominal approach spondylolisthesis |
| 58150           | 3          | Total abdominal hysterectomy (corpus and cervix), with or without removal of tube(s), with or without removal of ovary(s);                                                               |
| 58180           | 3          | Supracervical abdominal hysterectomy (subtotal hysterectomy), with or without removal of tube(s), with or without removal of ovary(s)                                                    |
| 58260           | 2          | Vaginal hysterectomy, for uterus 250 g or less;                                                                                                                                          |
| 58262           | 2          | Vaginal hysterectomy, for uterus 250 g or less; with removal of tube(s), and/or ovary(s)                                                                                                 |
| 58550           | 3          | Laparoscopy, surgical, with vaginal hysterectomy, for uterus 250 g or less;                                                                                                              |
| 58552           | 3          | Laparoscopy, surgical, with vaginal hysterectomy, for uterus 250 g or less; with removal of tube(s) and/or ovary(s)                                                                      |
| 58565           | 2          | Hysteroscopy, surgical; with bilateral fallopian tube cannulation to induce occlusion by placement of permanent implants                                                                 |
| 58571           | 3          | Laparoscopy, surgical, with total hysterectomy, for uterus 250 g or less; with removal of tube(s) and/or ovary(s)                                                                        |
| 58720           | 2          | Salpingo-oophorectomy, complete or partial, unilateral or bilateral (separate procedure)                                                                                                 |
| 60210           | 2          | Partial thyroid lobectomy, unilateral; with or without isthmusectomy                                                                                                                     |
| 60220           | 2          | Total thyroid lobectomy, unilateral; with or without isthmusectomy                                                                                                                       |
| 60240           | 2          | Thyroidectomy, total or complete                                                                                                                                                         |

| <b>CPT Code</b> | <b>OSS</b> | <b>CPT Description</b>                                                                                                                                                                                                                                                                                |
|-----------------|------------|-------------------------------------------------------------------------------------------------------------------------------------------------------------------------------------------------------------------------------------------------------------------------------------------------------|
| 60252           | 2          | Thyroidectomy, total or subtotal for malignancy; with limited neck dissection                                                                                                                                                                                                                         |
| 60254           | 3          | Thyroidectomy, total or subtotal for malignancy; with radical neck dissection                                                                                                                                                                                                                         |
| 60260           | 2          | Thyroidectomy, removal of all remaining thyroid tissue following previous removal of a portion of thyroid                                                                                                                                                                                             |
| 60271           | 3          | Thyroidectomy, including substernal thyroid; cervical approach                                                                                                                                                                                                                                        |
| 60280           | 2          | Excision of thyroglossal duct cyst or sinus;                                                                                                                                                                                                                                                          |
| 60500           | 2          | Parathyroidectomy or exploration of parathyroid(s);                                                                                                                                                                                                                                                   |
| 60540           | 3          | Adrenalectomy, partial or complete, or exploration of adrenal gland with or without biopsy, transabdominal, lumbar or dorsal (separate procedure);                                                                                                                                                    |
| 60650           | 3          | Laparoscopy, surgical, with adrenalectomy, partial or complete, or exploration of adrenal gland with or without biopsy, transabdominal, lumbar or dorsal                                                                                                                                              |
| 61154           | 3          | Burr hole(s) with evacuation and/or drainage of hematoma, extradural or subdural                                                                                                                                                                                                                      |
| 61312           | 4          | Craniectomy or craniotomy for evacuation of hematoma, supratentorial; extradural or subdural                                                                                                                                                                                                          |
| 61510           | 3          | Craniectomy, trephination, bone flap craniotomy; for excision of brain tumor, supratentorial, except meningioma                                                                                                                                                                                       |
| 61512           | 3          | Craniectomy, trephination, bone flap craniotomy; for excision of meningioma, supratentorial                                                                                                                                                                                                           |
| 61518           | 3          | Craniectomy for excision of brain tumor, infratentorial or posterior fossa; except meningioma, cerebellopontine angle tumor, or midline tumor at base of skull                                                                                                                                        |
| 61548           | 3          | Hypophysectomy or excision of pituitary tumor, transnasal or transseptal approach, nonstereotactic                                                                                                                                                                                                    |
| 61750           | 2          | Stereotactic biopsy, aspiration, or excision, including burr hole(s), for intracranial lesion;                                                                                                                                                                                                        |
| 61867           | 3          | Twist drill, burr hole, craniotomy, or craniectomy with stereotactic implantation of neurostimulator electrode array in subcortical site (eg, thalamus, globus pallidus, subthalamic nucleus, periventricular, periaqueductal gray), with use of intraoperative microelectrode recording; first array |
| 61885           | 3          | Insertion or replacement of cranial neurostimulator pulse generator or receiver, direct or inductive coupling; with connection to a single electrode array                                                                                                                                            |
| 61886           | 3          | Insertion or replacement of cranial neurostimulator pulse generator or receiver, direct or inductive coupling; with connection to 2 or more electrode arrays                                                                                                                                          |
| 62165           | 3          | Neuroendoscopy, intracranial; with excision of pituitary tumor, transnasal or trans-sphenoidal approach                                                                                                                                                                                               |
| 62223           | 3          | Creation of shunt; ventriculo-peritoneal, -pleural, other terminus                                                                                                                                                                                                                                    |
| 62230           | 3          | Replacement or revision of cerebrospinal fluid shunt, obstructed valve, or distal catheter in shunt system                                                                                                                                                                                            |
| 62362           | 2          | Implantation or replacement of device for intrathecal or epidural drug infusion; programmable pump, including preparation of pump, with or without programming                                                                                                                                        |
| 63001           | 3          | Laminectomy with exploration and/or decompression of spinal cord and/or cauda equina, without facetectomy, foraminotomy or discectomy (eg, spinal stenosis), 1 or 2 vertebral segments; cervical                                                                                                      |
| 63003           | 3          | Laminectomy with exploration and/or decompression of spinal cord and/or cauda equina, without facetectomy, foraminotomy or discectomy (eg, spinal stenosis), 1 or 2 vertebral segments; thoracic                                                                                                      |
| 63005           | 3          | Laminectomy with exploration and/or decompression of spinal cord and/or cauda equina, without facetectomy, foraminotomy or discectomy (eg, spinal stenosis), 1 or 2 vertebral segments; lumbar, except for                                                                                            |
| 63015           | 3          | Laminectomy with exploration and/or decompression of spinal cord and/or cauda equina, without facetectomy, foraminotomy or discectomy (eg, spinal stenosis), more than 2 vertebral segments; cervical                                                                                                 |
| 63017           | 3          | Laminectomy with exploration and/or decompression of spinal cord and/or cauda equina, without facetectomy, foraminotomy or discectomy (eg, spinal stenosis), more than 2 vertebral segments; lumbar                                                                                                   |

| <b>CPT Code</b> | <b>OSS</b> | <b>CPT Description</b>                                                                                                                                                                                                                                          |
|-----------------|------------|-----------------------------------------------------------------------------------------------------------------------------------------------------------------------------------------------------------------------------------------------------------------|
| 63020           | 2          | Laminotomy (hemilaminectomy), with decompression of nerve root(s), including partial facetectomy, foraminotomy and/or excision of herniated intervertebral disc; 1 interspace, cervical                                                                         |
| 63030           | 2          | Laminotomy (hemilaminectomy), with decompression of nerve root(s), including partial facetectomy, foraminotomy and/or excision of herniated intervertebral disc; 1 interspace, lumbar                                                                           |
| 63042           | 3          | Laminotomy (hemilaminectomy), with decompression of nerve root(s), including partial facetectomy, foraminotomy and/or excision of herniated intervertebral disc, reexploration, single interspace; lumbar                                                       |
| 63045           | 2          | Laminectomy, facetectomy and foraminotomy (unilateral or bilateral with decompression of spinal cord, cauda equina and/or nerve root[s], [eg, spinal or lateral recess stenosis]), single vertebral segment; cervical                                           |
| 63047           | 2          | Laminectomy, facetectomy and foraminotomy (unilateral or bilateral with decompression of spinal cord, cauda equina and/or nerve root[s], [eg, spinal or lateral recess stenosis]), single vertebral segment; lumbar                                             |
| 63050           | 3          | Laminoplasty, cervical, with decompression of the spinal cord, 2 or more vertebral segments;                                                                                                                                                                    |
| 63051           | 3          | Laminoplasty, cervical, with decompression of the spinal cord, 2 or more vertebral segments; with reconstruction of the posterior bony elements (including the application of bridging bone graft and non-segmental fixation devices [eg, wire, suture, mini-pl |
| 63075           | 2          | Discectomy, anterior, with decompression of spinal cord and/or nerve root(s), including osteophyctomy; cervical, single interspace                                                                                                                              |
| 63081           | 3          | Vertebral corpectomy (vertebral body resection), partial or complete, anterior approach with decompression of spinal cord and/or nerve root(s); cervical, single segment                                                                                        |
| 63267           | 3          | Laminectomy for excision or evacuation of intraspinal lesion other than neoplasm, extradural; lumbar                                                                                                                                                            |
| 63655           | 2          | Laminectomy for implantation of neurostimulator electrodes, plate/paddle, epidural                                                                                                                                                                              |
| 63685           | 2          | Insertion or replacement of spinal neurostimulator pulse generator or receiver, direct or inductive coupling                                                                                                                                                    |
| 63688           | 2          | Revision or removal of implanted spinal neurostimulator pulse generator or receiver                                                                                                                                                                             |
| 64708           | 2          | Neuroplasty, major peripheral nerve, arm or leg, open; other than specified                                                                                                                                                                                     |
| 64718           | 2          | Neuroplasty and/or transposition; ulnar nerve at elbow                                                                                                                                                                                                          |
| 64721           | 1          | Neuroplasty and/or transposition; median nerve at carpal tunnel                                                                                                                                                                                                 |
| 64831           | 2          | Suture of digital nerve, hand or foot; 1 nerve                                                                                                                                                                                                                  |
| 69714           | 3          | Implantation, osseointegrated implant, temporal bone, with percutaneous attachment to external speech processor/cochlear stimulator; without mastoidectomy                                                                                                      |



5) In the past 5 years, have you been diagnosed or treated for cancer other than basal cell cancer?

No (+0)       Yes (See Chart)

6) In the past 3 months, have you lost 10 pounds or more without trying?

No (+0)       Yes (+4)

7) Is your appetite currently poor?

No (+0)       Yes (+4)

8) During the last 3 months, has it become more difficult for you to remember things or organize your thoughts?

No (+0)       Yes (see chart)

### Activities of Daily Living

#### Mobility:

- Can get around without any help. (+0)
- Needs help from a cane, walker or scooter. (+1)
- Needs help from others to get around the house or neighborhood. (+2)
- Needs help getting in or out of a chair. (+3)
- Totally dependent on others to get around. (+4)

#### Eating:

- Can plan and prepare own meals. (+0)
- Needs help planning meals. (+1)
- Needs help preparing meals. (+2)
- Needs help eating meals. (+3)
- Totally dependent on others to eat meals. (+4)

#### Toileting:

- Can use the toilet without help. (+0)
- Needs help getting to or from the toilet. (+1)
- Needs help to use toilet paper. (+2)
- Cannot use a standard toilet, but with help can use a bedpan/urinal. (+3)
- Totally dependent on others to manage toileting. (+4)

#### Personal Hygiene:

- Can shower or bathe without prompting or help. (+0)
- Can shower or bathe without help when prompted. (+1)

- Needs help preparing the tub or shower. (+2)
- Needs some help with some elements of washing. (+3)
- Totally dependent on others to shower or bathe. (+4)

**Total ADL Score=Mobility+Eating+Toileting+Hygiene (range 0-16): \_\_\_\_\_**

**Total RAI Score\_\_\_\_\_ (See chart to calculate Age\***Cancer** and ADL\***Cog** scores; then sum all remaining items as scored above)**

| Variable                         | Revised RAI       |                  |
|----------------------------------|-------------------|------------------|
| Sex                              | 3                 |                  |
| Age*Cancer                       | <u>w/o cancer</u> | <u>w/ cancer</u> |
| Age                              |                   |                  |
| <=19                             | 0                 | 28               |
| 20-24                            | 1                 | 29               |
| 25-29                            | 4                 | 29               |
| 30-34                            | 6                 | 30               |
| 35-39                            | 8                 | 30               |
| 40-44                            | 10                | 31               |
| 45-49                            | 12                | 31               |
| 50-54                            | 14                | 32               |
| 55-59                            | 16                | 32               |
| 60-64                            | 18                | 33               |
| 65-69                            | 20                | 34               |
| 70-74                            | 22                | 34               |
| 75-79                            | 24                | 35               |
| 80-84                            | 26                | 35               |
| 85-89                            | 28                | 36               |
| 90-94                            | 30                | 36               |
| 95-99                            | 32                | 37               |
| 100+                             | 34                | 37               |
| Weight Loss                      | 4                 |                  |
| Poor Appetite                    | 4                 |                  |
| Renal Failure                    | 8                 |                  |
| Chronic/Congestive Heart Failure | 5                 |                  |
| Shortness of Breath              | 3                 |                  |
| Residence other than Ind. Living | 1                 |                  |
| ADL*Cog                          | <u>w/o cog</u>    | <u>w/ cog</u>    |
| ADL Score                        |                   |                  |
| 0                                | 0                 | 5                |
| 1                                | 1                 | 6                |
| 2                                | 2                 | 6                |
| 3                                | 3                 | 7                |
| 4                                | 4                 | 8                |
| 5                                | 4                 | 8                |
| 6                                | 5                 | 9                |
| 7                                | 6                 | 10               |
| 8                                | 7                 | 11               |
| 9                                | 8                 | 11               |
| 10                               | 9                 | 12               |
| 11                               | 10                | 13               |
| 12                               | 11                | 13               |
| 13                               | 11                | 14               |
| 14                               | 12                | 15               |
| 15                               | 13                | 15               |
| 16                               | 14                | 16               |
| Total RAI                        | <u>0</u>          | <u>81</u>        |

## eReferences

- <sup>1</sup>Varley PR, Borreback JD, Arya S, Massarweh NN, Bilderback AL, Wisniewski MK, Nelson JB, Johnson JT, Johanning JM, Hall DE. Clinical Utility of the Risk Analysis Index as a Prospective Frailty Screening Tool within a Multi-practice, Multi-hospital Integrated Healthcare System. *Ann Surg.* 10.1097/SLA.0000000000003808. 2020
- <sup>2</sup>Arya S, Varley P, Youk A, Borreback JA, Perez S, Massarweh NN, Johanning JM, Hall DE. Recalibration and External Validation of the Risk Analysis Index: A Surgical Frailty Assessment Tool. *Ann Surg.* 10.1097/SLA.0000000000003276. 2019.
